# Supplementary material for: Polymeric polyiodo-chlorotellurates(iv): new supramolecular hybrids in halometalate chemistry
Source: Royal Society of Chemistry journal article supplement (doi:10.1039/d4ce00088a), 2024-01-01
Supplement: d4ce00088a1.pdf [file d4ce00088a1.pdf]

## Polymeric polyiodo-chlorotellurates(IV): new supramolecular hybrids within the halometalate chemistry

Nikita A. Korobeynikov, Andrey N. Usoltsev, Maxim N. Sokolov, Alexander S. Novikov and Sergey Adonin\*

### Powder X-ray diffractometry (PXRD)

Analysis of polycrystals was performed on Bruker D8 Advance (CuK $\alpha$  radiation, LYNXEYE XE-T linear detector, 4 – 50° 2 $\theta$  range, 0.03° 2 $\theta$  step, 0.5s per step). A polycrystalline sample was slightly ground with hexane in an agate mortar, and the resulting suspensions were deposited on the polished side of a standard quartz sample holder, and a smooth thin layer being formed after drying. The diffraction patterns of **1-3** were completely indexed by the results of the corresponding single crystal studies, and no extra lines were found, which indicated that the products were a single phase. Samples of **4** and **5** contain phases that were not identified.

**Raman spectra** were collected using a LabRAM HR Evolution (Horiba) spectrometer with the excitation by the 633 nm line of the He-Ne laser. The spectra at room temperatures were obtained in the backscattering geometry with a Raman microscope. The laser beam was focused to a diameter of 2  $\mu$ m using a LMPlan FL 50x/0.50 Olympus objective. The spectral resolution was 0.7 cm $^{-1}$ . The laser power on the sample surface was about 0.03 mW.

**Thermogravimetric analysis (TGA)** of **1-3** were carried out on a TG 209 F1 Iris thermobalance (NETZSCH, Germany). The measurements were made in a helium flow in the temperature range of 30–450°C using the heating rate of 10°C/min the gas flow rate of 60 mL/min and open Al crucibles.

**Diffuse reflectance spectra** of **1-3** were measured on a setup which consists of a Kolibri-2 spectrometer (VMK Optoelektronika, Russia), fiber optic cable QR-400-7 (Ocean Optics, USA), and deuterium–tungsten lamp AvaLight-DHS (Avantes, Netherlands). The reference of 100% reflectance was BaSO $_4$  powder. The spectra were recorded five times in the wavelength interval of 300–1000 nm and then averaged to reduce the random error.

### Computational details

The single point calculations based on the experimental X-ray geometries of **1–5** have been carried out at the DFT level of theory using the dispersion-corrected hybrid functional  $\omega$ B97XD [Phys. Chem. Chem. Phys. 2008, 10, 6615.] with the help of Gaussian-09 [M. J. Frisch et al. Gaussian 09, Revision C.01, Gaussian, Inc., Wallingford, CT, 2010.] program package. The Douglas–Kroll–Hess 2<sup>nd</sup> order scalar relativistic calculations requested relativistic core Hamiltonian were carried out using the DZP-DKH basis sets [Mol. Phys. 2010, 108, 1965. || J. Chem. Phys. 2009, 130, 064108. || Chem. Phys. Lett. 2013, 582, 158. || J. Mol. Struct. - Theochem 2010, 961, 107.] for all atoms. The topological analysis of the electron density distribution has been performed by using the Multiwfn program (version 3.7) [J. Comput. Chem. 2012, 33, 580.]. Results are summarized in Table S7. The Cartesian atomic coordinates for model supramolecular associates are presented in Table S8.

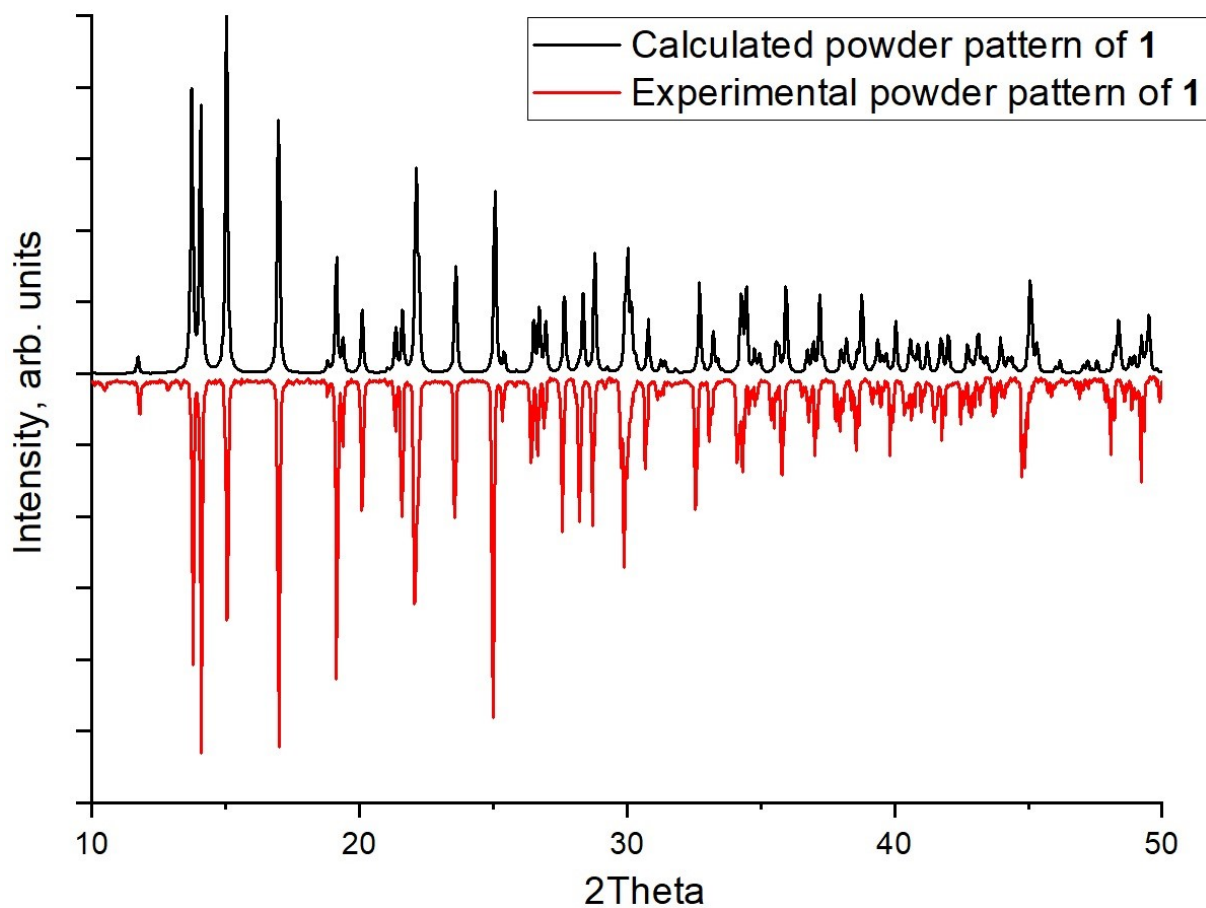

Figure S1. Experimental and calculated powder pattern of 1.

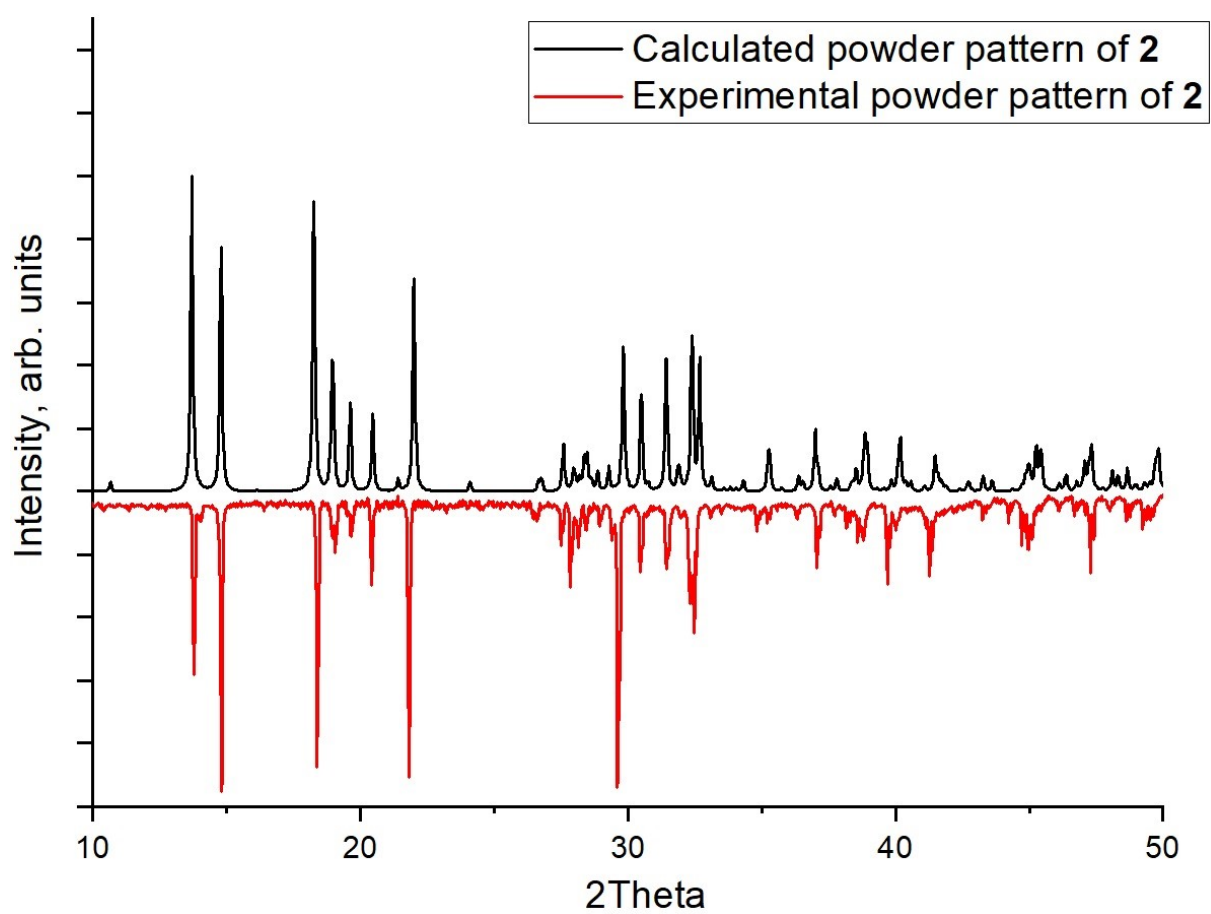

Figure S2. Experimental and calculated powder pattern of 2.

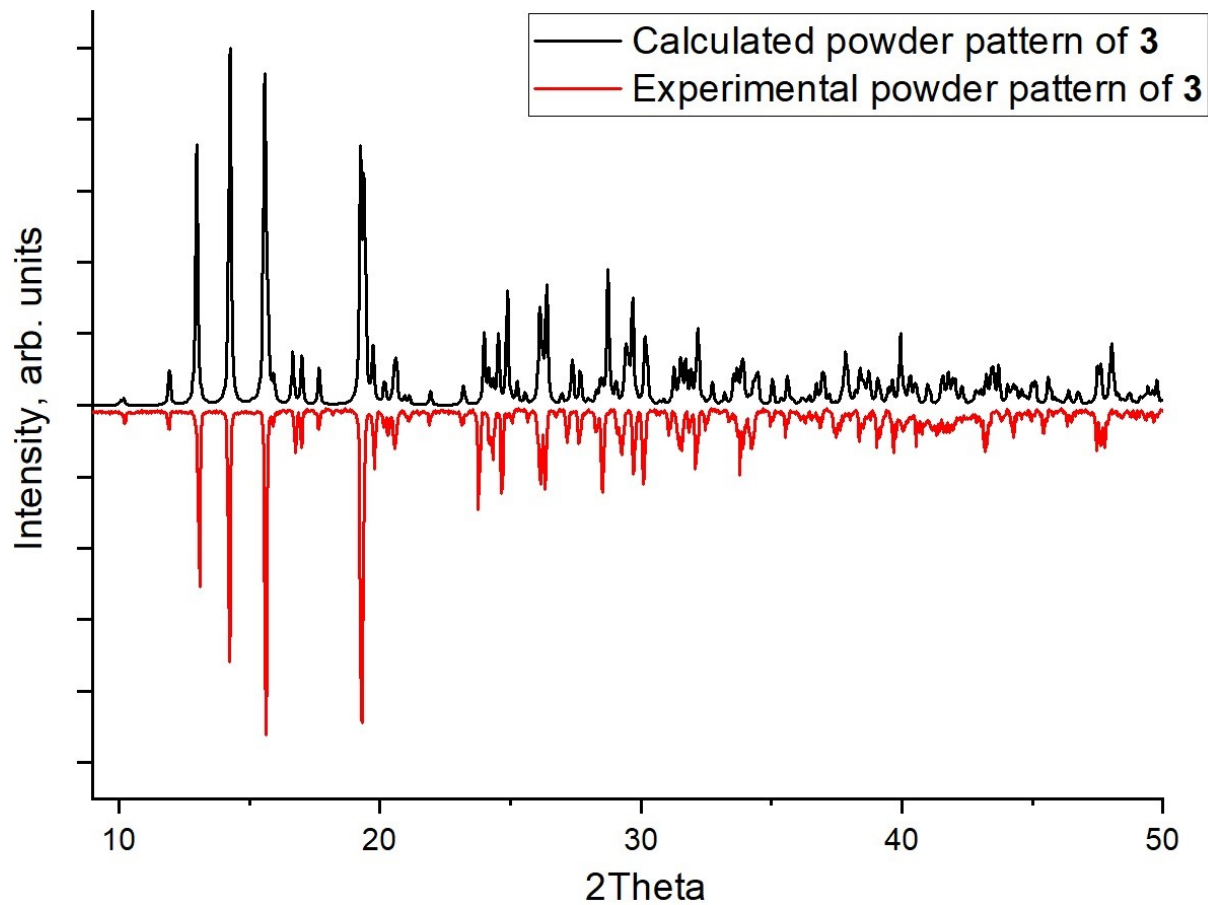

Figure S3. Experimental and calculated powder pattern of 3.

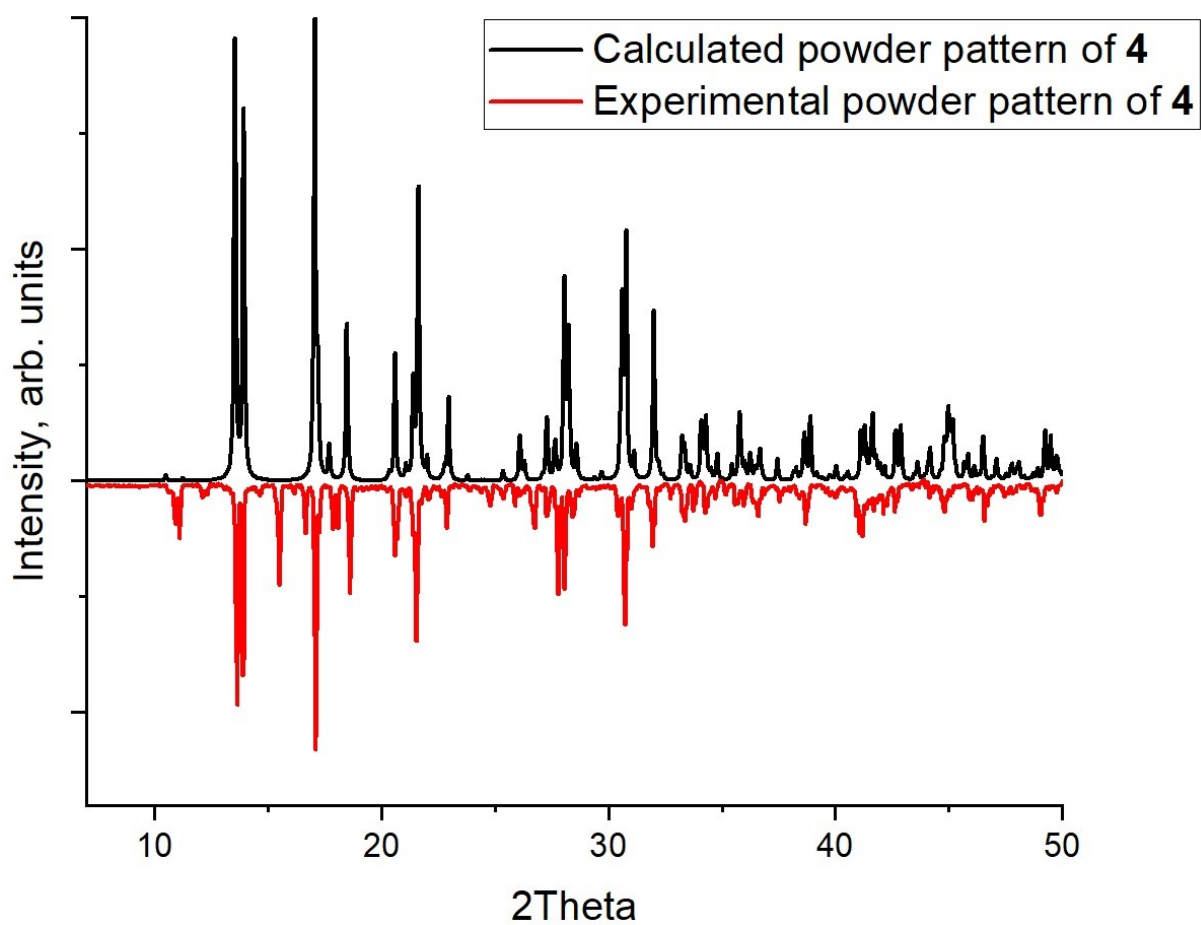

Figure S4. Experimental and calculated powder pattern of 4.

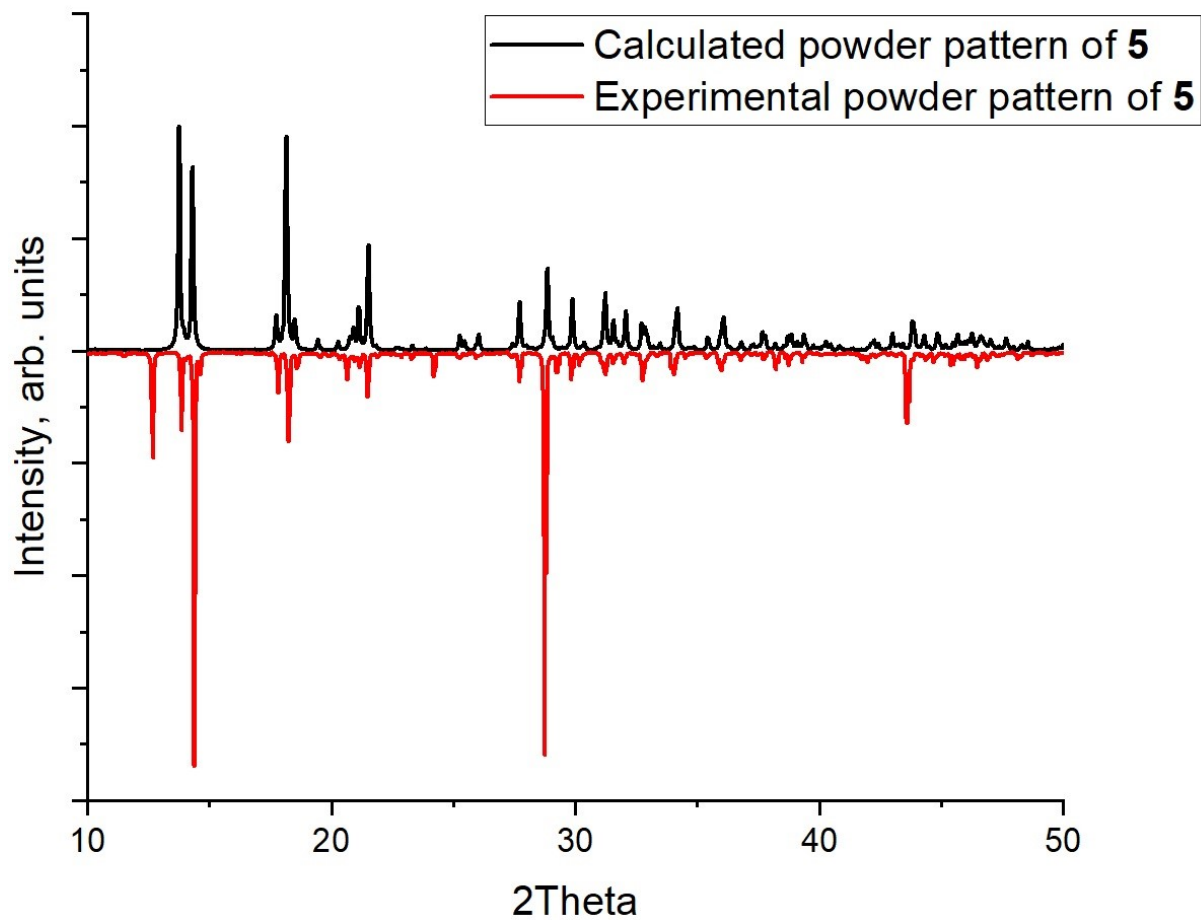

Figure S5. Experimental and calculated powder pattern of **5**.

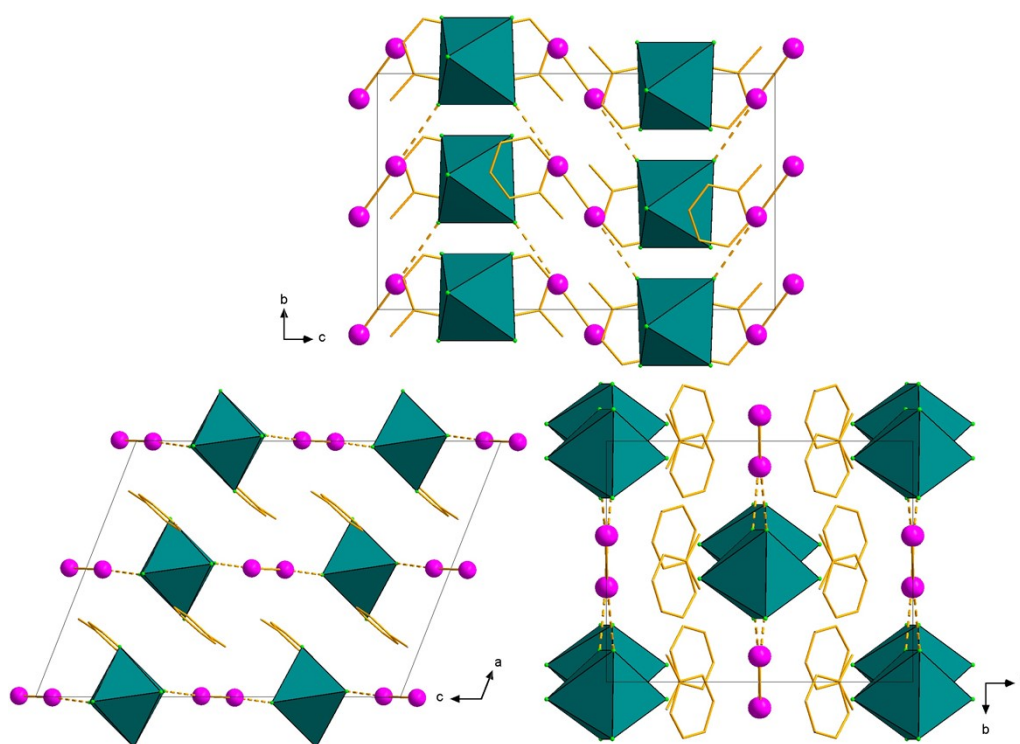

Figure S6. Crystal packing along *a* (top), *b* (bottom left) and *c* (bottom right) axes in **4**. Only one disordered part of cation with occupancy of 64% is shown.

Table S1. Crystal data and structure refinement for **1–5**.

| Identification code                       | <b>1</b>                                                                        | <b>2</b>                                                                        | <b>3</b>                                                                        | <b>4</b>                                                                        | <b>5</b>                                                                       |
|-------------------------------------------|---------------------------------------------------------------------------------|---------------------------------------------------------------------------------|---------------------------------------------------------------------------------|---------------------------------------------------------------------------------|--------------------------------------------------------------------------------|
| CCDC number                               | 2310058                                                                         | 2310059                                                                         | 2310060                                                                         | 2310061                                                                         | 2310062                                                                        |
| Empirical formula                         | C <sub>12</sub> H <sub>16</sub> N <sub>2</sub> TeCl <sub>6</sub> I <sub>2</sub> | C <sub>10</sub> H <sub>12</sub> N <sub>2</sub> TeCl <sub>6</sub> I <sub>2</sub> | C <sub>12</sub> H <sub>16</sub> N <sub>2</sub> TeCl <sub>6</sub> I <sub>2</sub> | C <sub>12</sub> H <sub>16</sub> N <sub>2</sub> TeCl <sub>6</sub> I <sub>2</sub> | C <sub>6</sub> H <sub>20</sub> N <sub>2</sub> TeCl <sub>6</sub> I <sub>2</sub> |
| M, g/mol                                  | 782.37                                                                          | 754.32                                                                          | 782.37                                                                          | 782.37                                                                          | 714.34                                                                         |
| Temperature/K                             | 150(2)                                                                          | 150(2)                                                                          | 150(2)                                                                          | 150(2)                                                                          | 150(2)                                                                         |
| Crystal system                            | <i>Tetragonal</i>                                                               | <i>Monoclinic</i>                                                               | <i>Monoclinic</i>                                                               | <i>Monoclinic</i>                                                               | <i>Monoclinic</i>                                                              |
| Space group                               | <i>P4<sub>1</sub>2<sub>1</sub>2</i>                                             | <i>C2/c</i>                                                                     | <i>P2/c</i>                                                                     | <i>C2/c</i>                                                                     | <i>P2<sub>1</sub>/c</i>                                                        |
| a, Å                                      | 9.4279(2)                                                                       | 16.9466(9)                                                                      | 17.8598(11)                                                                     | 13.6493(11)                                                                     | 12.6722(2)                                                                     |
| b, Å                                      | 9.4279(2)                                                                       | 9.6814(5)                                                                       | 7.4112(5)                                                                       | 10.0133(6)                                                                      | 9.9937(2)                                                                      |
| c, Å                                      | 25.1636(7)                                                                      | 13.3524(7)                                                                      | 17.6492(11)                                                                     | 18.0921(14)                                                                     | 17.2207(3)                                                                     |
| α, deg.                                   | 90                                                                              | 90                                                                              | 90                                                                              | 90                                                                              | 90                                                                             |
| β, deg.                                   | 90                                                                              | 108.691(2)                                                                      | 100.334(2)                                                                      | 111.399(4)                                                                      | 102.588(1)                                                                     |
| γ, deg.                                   | 90                                                                              | 90                                                                              | 90                                                                              | 90                                                                              | 90                                                                             |
| Volume, Å <sup>3</sup>                    | 2236.67(11)                                                                     | 2075.15(19)                                                                     | 2298.2(3)                                                                       | 2302.3(3)                                                                       | 2128.44(7)                                                                     |
| Z                                         | 4                                                                               | 4                                                                               | 4                                                                               | 4                                                                               | 4                                                                              |
| ρ <sub>calc</sub> , g/cm <sup>3</sup>     | 2.323                                                                           | 2.414                                                                           | 2.261                                                                           | 2.257                                                                           | 2.229                                                                          |
| μ, mm <sup>-1</sup>                       | 4.81                                                                            | 5.18                                                                            | 4.68                                                                            | 4.67                                                                            | 5.04                                                                           |
| F(000)                                    | 1448                                                                            | 1384                                                                            | 1448                                                                            | 1448                                                                            | 1320                                                                           |
| Crystal size, mm                          | 0.06 × 0.04 × 0.04                                                              | 0.17 × 0.10 × 0.02                                                              | 0.18 × 0.06 × 0.02                                                              | 0.07 × 0.05 × 0.03                                                              | 0.09 × 0.07 × 0.05                                                             |
| Θ range for data collection, deg.         | 2.307 to 31.516                                                                 | 2.457 to 30.538                                                                 | 2.318 to 31.581                                                                 | 2.418 to 30.552                                                                 | 1.647 to 33.153                                                                |
| Tmin, Tmax                                | 0.640; 0.746                                                                    | 0.551; 0.746                                                                    | 0.551; 0.746                                                                    | 0.658; 0.747                                                                    | 0.609; 0.746                                                                   |
| Index ranges                              | -13 ≤ h ≤ 11, -13 ≤ k ≤ 9,<br>-28 ≤ l ≤ 37                                      | -21 ≤ h ≤ 24, -13 ≤ k ≤ 13,<br>-18 ≤ l ≤ 19                                     | -26 ≤ h ≤ 26, -10 ≤ k ≤ 10,<br>-25 ≤ l ≤ 21                                     | 19 ≤ h ≤ 19, -14 ≤ k ≤ 14,<br>-25 ≤ l ≤ 21                                      | -19 ≤ h ≤ 19, -15 ≤ k ≤ 15,<br>-26 ≤ l ≤ 26                                    |
| R <sub>int</sub>                          | 0.040                                                                           | 0.048                                                                           | 0.037                                                                           | 0.046                                                                           | 0.032                                                                          |
| Reflections collected/independent         | 20945/3730                                                                      | 20758/3163                                                                      | 29958/7664                                                                      | 14647/3531                                                                      | 30325/8123                                                                     |
| Reflections with I > 2σ(I)                | 3422                                                                            | 2627                                                                            | 5821                                                                            | 2923                                                                            | 6710                                                                           |
| Data/restraints/parameters                | 3730/0/107                                                                      | 3163/72/151                                                                     | 7664/0/216                                                                      | 3531/69/171                                                                     | 8123/78/238                                                                    |
| Goodness-of-fit on F <sup>2</sup>         | 1.048                                                                           | 1.044                                                                           | 1.040                                                                           | 1.029                                                                           | 1.038                                                                          |
| Final R indexes [I > 2σ(I)]               | R <sub>1</sub> = 0.0226, wR <sub>2</sub> = 0.0378                               | R <sub>1</sub> = 0.0249, wR <sub>2</sub> = 0.0431                               | R <sub>1</sub> = 0.0313, wR <sub>2</sub> = 0.0498                               | R <sub>1</sub> = 0.0303, wR <sub>2</sub> = 0.0546                               | R <sub>1</sub> = 0.0280, wR <sub>2</sub> = 0.0549                              |
| Final R indexes [all data]                | R <sub>1</sub> = 0.0274, wR <sub>2</sub> = 0.0390                               | R <sub>1</sub> = 0.0376, wR <sub>2</sub> = 0.0454                               | R <sub>1</sub> = 0.0526, wR <sub>2</sub> = 0.0550                               | R <sub>1</sub> = 0.0418, wR <sub>2</sub> = 0.0578                               | R <sub>1</sub> = 0.0398, wR <sub>2</sub> = 0.0586                              |
| Largest diff. peak/hole, e/Å <sup>3</sup> | 0.47/-0.77                                                                      | 0.50/-0.62                                                                      | 1.37/-1.13                                                                      | 0.64/-0.96                                                                      | 0.83/-1.60                                                                     |

Table S2. Selected bond lengths and angles for **1**.

| <b>Bond length, Å</b>     |              |                                        |             |
|---------------------------|--------------|----------------------------------------|-------------|
| I1—I1 <sup>i</sup>        | 2.6917 (5)   | Te1—Cl2                                | 2.4900 (13) |
| Te1—Cl1 <sup>i</sup>      | 2.5486 (9)   | Te1—Cl3 <sup>i</sup>                   | 2.5310 (8)  |
| Te1—Cl1                   | 2.5486 (9)   | Te1—Cl3                                | 2.5309 (8)  |
| <b>Bond angle, (°)</b>    |              |                                        |             |
| Cl1—Te1—Cl1 <sup>i</sup>  | 179.59 (5)   | Cl3—Te1—Cl1 <sup>i</sup>               | 88.55 (3)   |
| Cl1 <sup>i</sup> —Te1—Cl4 | 90.21 (2)    | Cl3 <sup>i</sup> —Te1—Cl1              | 88.55 (3)   |
| Cl1—Te1—Cl4               | 90.21 (2)    | Cl3 <sup>i</sup> —Te1—Cl1 <sup>i</sup> | 91.46 (3)   |
| Cl2—Te1—Cl1               | 89.79 (2)    | Cl3—Te1—Cl1                            | 91.46 (3)   |
| Cl2—Te1—Cl1 <sup>i</sup>  | 89.79 (2)    | Cl3—Te1—Cl3 <sup>i</sup>               | 178.29 (5)  |
| Cl2—Te1—Cl3 <sup>i</sup>  | 90.85 (2)    | Cl3—Te1—Cl4                            | 89.15 (2)   |
| Cl2—Te1—Cl3               | 90.85 (2)    | Cl3 <sup>i</sup> —Te1—Cl4              | 89.15 (2)   |
| Cl2—Te1—Cl4               | 180.000 (14) |                                        |             |

Symmetry code(s): (i) y, x, -z+1.

Table S3. Selected bond lengths and angles for **2**.

| <b>Bond length, Å</b>                  |            |                                        |            |
|----------------------------------------|------------|----------------------------------------|------------|
| Te1—Cl1                                | 2.4601 (7) | Te1—Cl3                                | 2.6165 (7) |
| Te1—Cl1 <sup>i</sup>                   | 2.4601 (7) | Te1—Cl3 <sup>i</sup>                   | 2.6165 (7) |
| Te1—Cl2 <sup>i</sup>                   | 2.5334 (7) | I1—I1 <sup>ii</sup>                    | 2.6947 (3) |
| Te1—Cl2                                | 2.5334 (7) |                                        |            |
| <b>Bond angle, (°)</b>                 |            |                                        |            |
| Cl1—Te1—Cl1 <sup>i</sup>               | 89.72 (4)  | Cl1—Te1—Cl3                            | 179.03 (3) |
| Cl1—Te1—Cl2 <sup>i</sup>               | 89.19 (3)  | Cl2—Te1—Cl2 <sup>i</sup>               | 177.84 (4) |
| Cl1—Te1—Cl2                            | 89.28 (3)  | Cl2—Te1—Cl3 <sup>i</sup>               | 89.96 (3)  |
| Cl1 <sup>i</sup> —Te1—Cl2 <sup>i</sup> | 89.28 (3)  | Cl2 <sup>i</sup> —Te1—Cl3 <sup>i</sup> | 91.56 (3)  |
| Cl1 <sup>i</sup> —Te1—Cl2              | 89.19 (3)  | Cl2—Te1—Cl3                            | 91.55 (3)  |
| Cl1 <sup>i</sup> —Te1—Cl3              | 89.80 (3)  | Cl2 <sup>i</sup> —Te1—Cl3              | 89.96 (3)  |
| Cl1 <sup>i</sup> —Te1—Cl3 <sup>i</sup> | 179.03 (3) | Cl3—Te1—Cl3 <sup>i</sup>               | 90.70 (4)  |
| Cl1—Te1—Cl3 <sup>i</sup>               | 89.80 (3)  |                                        |            |

Symmetry code(s): (i) -x+1, y, -z+1/2; (ii) -x+3/2, -y+1/2, -z+1.

Table S4. Selected bond lengths and angles for **3**.

| <b>Bond length, Å</b>  |            |             |            |
|------------------------|------------|-------------|------------|
| I1—I1 <sup>i</sup>     | 2.6991 (4) | Te1—Cl3     | 2.4525 (7) |
| I2—I2 <sup>ii</sup>    | 2.7018 (5) | Te1—Cl4     | 2.5145 (8) |
| Te1—Cl1                | 2.6282 (8) | Te1—Cl5     | 2.5381 (8) |
| Te1—Cl2                | 2.4250 (9) |             |            |
| <b>Bond angle, (°)</b> |            |             |            |
| Cl1—Te1—Cl6            | 88.26 (3)  | Cl3—Te1—Cl4 | 88.66 (3)  |
| Cl2—Te1—Cl1            | 92.47 (3)  | Cl3—Te1—Cl5 | 90.01 (3)  |
| Cl2—Te1—Cl3            | 92.21 (3)  | Cl3—Te1—Cl6 | 87.36 (3)  |
| Cl2—Te1—Cl4            | 90.60 (3)  | Cl4—Te1—Cl1 | 88.54 (3)  |
| Cl2—Te1—Cl5            | 87.54 (3)  | Cl4—Te1—Cl5 | 177.68 (3) |
| Cl2—Te1—Cl6            | 174.23 (3) | Cl4—Te1—Cl6 | 95.14 (3)  |
| Cl3—Te1—Cl1            | 174.57 (3) | Cl5—Te1—Cl1 | 92.94 (3)  |

Symmetry code(s): (i)  $-x, y, -z+1/2$ ; (ii)  $-x+1, y, -z+1/2$ .Table S5. Selected bond lengths and angles for **4**.

| <b>Bond length, Å</b>                  |            |                                        |            |
|----------------------------------------|------------|----------------------------------------|------------|
| Te1—Cl1 <sup>i</sup>                   | 2.5168 (8) | Te1—Cl3                                | 2.7347 (8) |
| Te1—Cl1                                | 2.5168 (8) | Te1—Cl3 <sup>i</sup>                   | 2.7347 (8) |
| Te1—Cl2                                | 2.4086 (8) | I2—I2 <sup>ii</sup>                    | 2.7043 (4) |
| Te1—Cl2 <sup>i</sup>                   | 2.4086 (8) |                                        |            |
| <b>Bond angle, (°)</b>                 |            |                                        |            |
| Cl1—Te1—Cl1 <sup>i</sup>               | 178.13 (4) | Cl2 <sup>i</sup> —Te1—Cl1              | 89.42 (3)  |
| Cl1 <sup>i</sup> —Te1—Cl3 <sup>i</sup> | 91.18 (3)  | Cl2 <sup>i</sup> —Te1—Cl2              | 90.48 (4)  |
| Cl1—Te1—Cl3 <sup>i</sup>               | 90.19 (3)  | Cl2 <sup>i</sup> —Te1—Cl3              | 91.46 (3)  |
| Cl1 <sup>i</sup> —Te1—Cl3              | 90.19 (3)  | Cl2—Te1—Cl3                            | 178.01 (3) |
| Cl1—Te1—Cl3                            | 91.18 (3)  | Cl2 <sup>i</sup> —Te1—Cl3 <sup>i</sup> | 178.01 (3) |
| Cl2—Te1—Cl1                            | 89.26 (3)  | Cl2—Te1—Cl3 <sup>i</sup>               | 91.46 (3)  |
| Cl2—Te1—Cl1 <sup>i</sup>               | 89.42 (3)  | Cl3 <sup>i</sup> —Te1—Cl3              | 86.59 (4)  |
| Cl2 <sup>i</sup> —Te1—Cl1 <sup>i</sup> | 89.27 (3)  |                                        |            |

Symmetry code(s): (i)  $-x+1, y, -z+1/2$ ; (ii)  $-x+1, -y, -z+1$ .

Table S6. Selected bond lengths and angles for **5**.

| <b>Bond length, Å</b>  |            |             |            |
|------------------------|------------|-------------|------------|
| I1—I2                  | 2.6939 (2) | Te1—Cl4     | 2.4455 (6) |
| Te1—Cl1                | 2.5153 (7) | Te1—Cl5     | 2.4076 (7) |
| Te1—Cl2                | 2.5155 (7) | Te1—Cl6     | 2.6494 (7) |
| Te1—Cl3                | 2.6772 (7) |             |            |
| <b>Bond angle, (°)</b> |            |             |            |
| Cl1—Te1—Cl2            | 179.56 (3) | Cl4—Te1—Cl6 | 179.52 (2) |
| Cl1—Te1—Cl3            | 93.43 (3)  | Cl5—Te1—Cl1 | 89.93 (3)  |
| Cl1—Te1—Cl6            | 88.55 (3)  | Cl5—Te1—Cl2 | 89.69 (3)  |
| Cl2—Te1—Cl3            | 86.95 (3)  | Cl5—Te1—Cl3 | 176.27 (3) |
| Cl2—Te1—Cl6            | 91.22 (2)  | Cl5—Te1—Cl4 | 91.49 (3)  |
| Cl4—Te1—Cl1            | 91.08 (3)  | Cl5—Te1—Cl6 | 88.81 (3)  |
| Cl4—Te1—Cl2            | 89.15 (2)  | Cl6—Te1—Cl3 | 92.89 (3)  |
| Cl4—Te1—Cl3            | 86.84 (3)  |             |            |

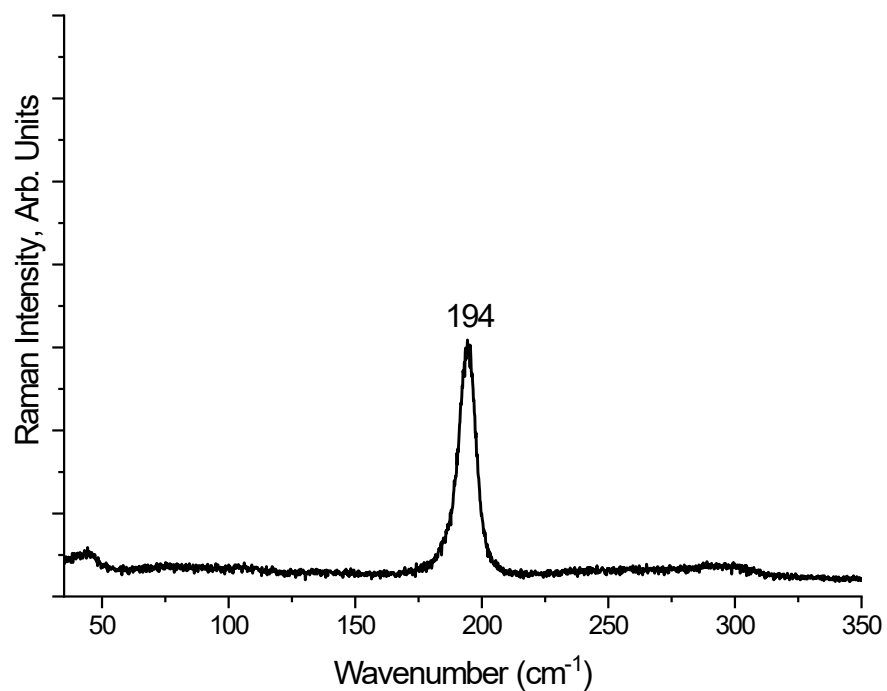

Figure S7. Raman spectrum of **2**.



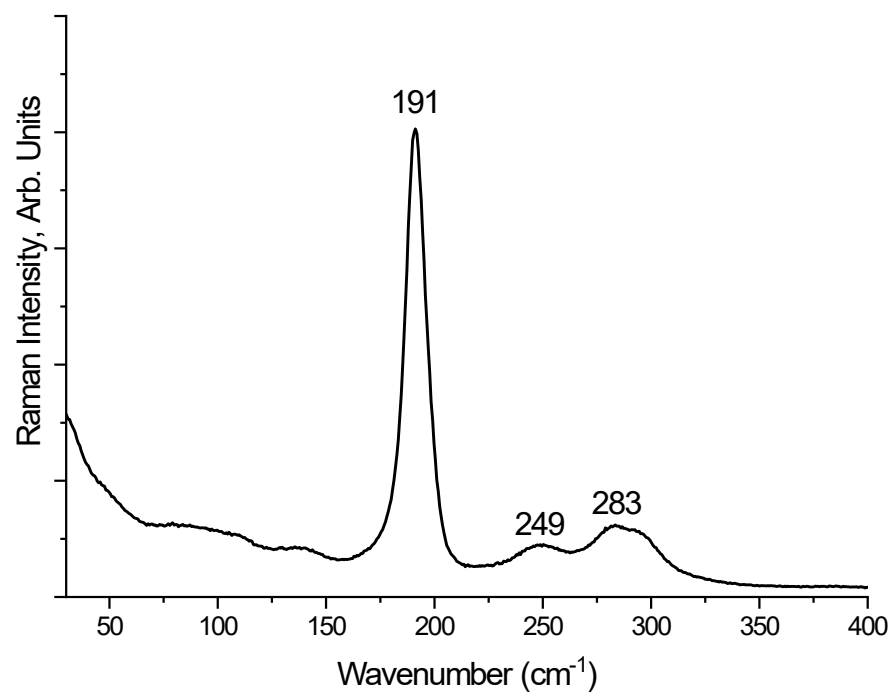

Figure S8. Raman spectrum of 3.

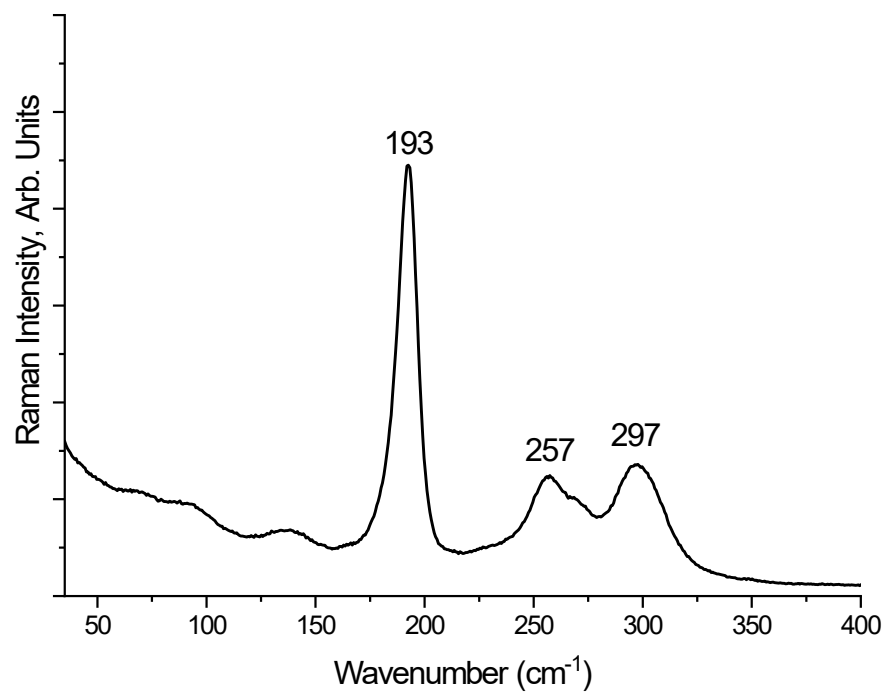

Figure S9. Raman spectrum of 4.

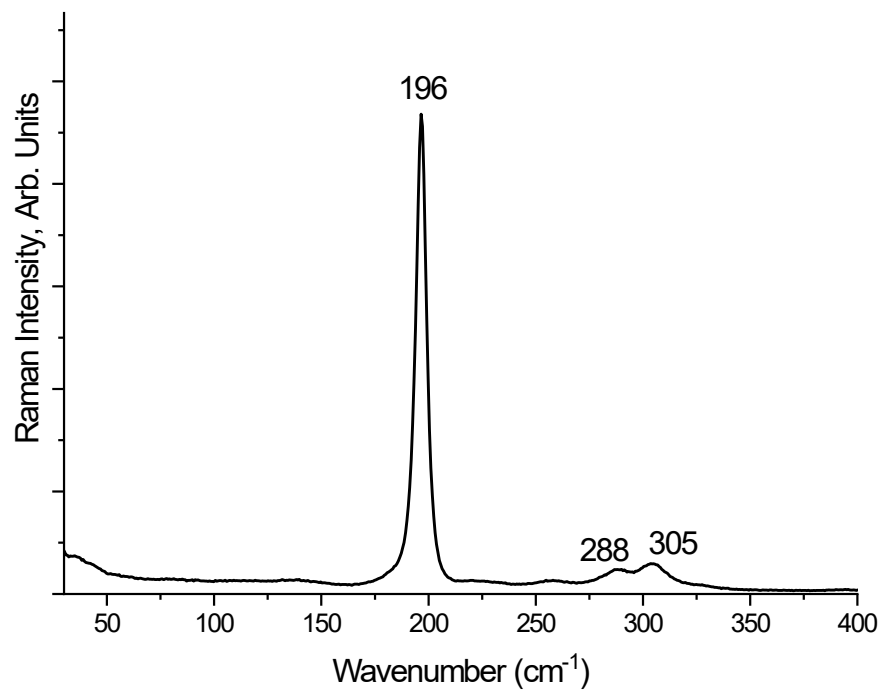

Figure S10. Raman spectrum of **5**.

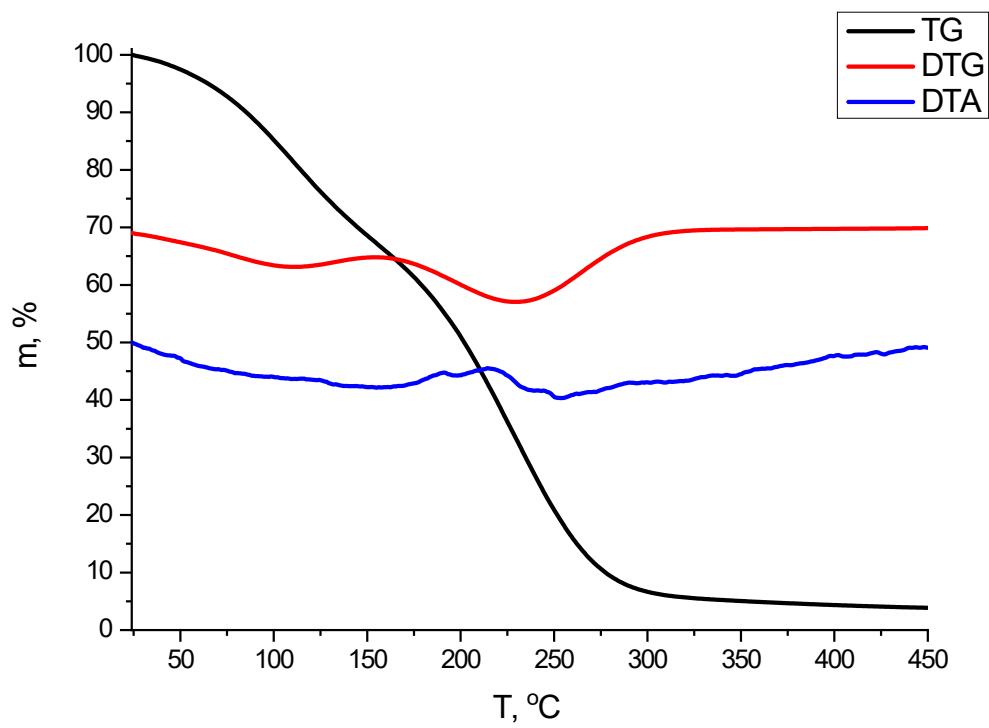

Figure S11. TG, DTG and DTA data for **2**.

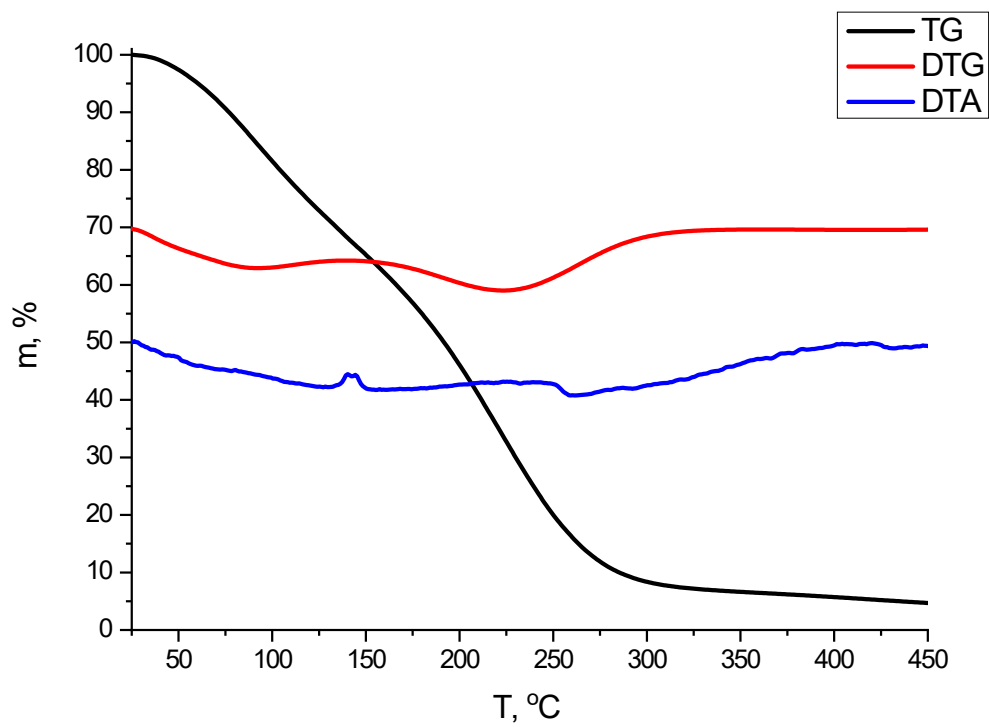

Figure S12. TG, DTG and DTA data for 3.

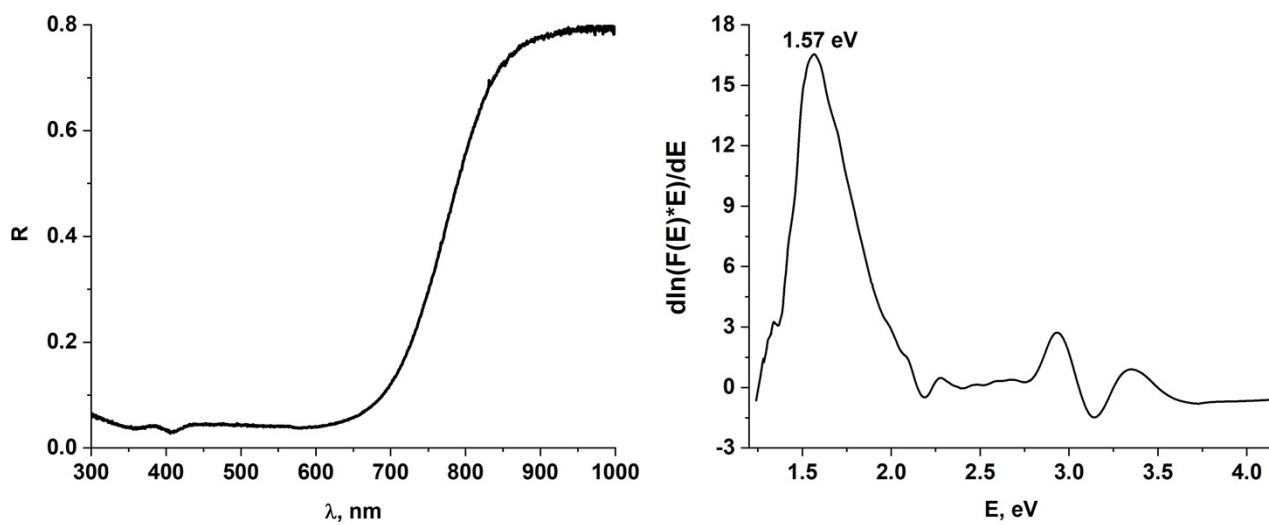

Figure S13. Diffuse reflectance spectra and optical band gap determination for 1.

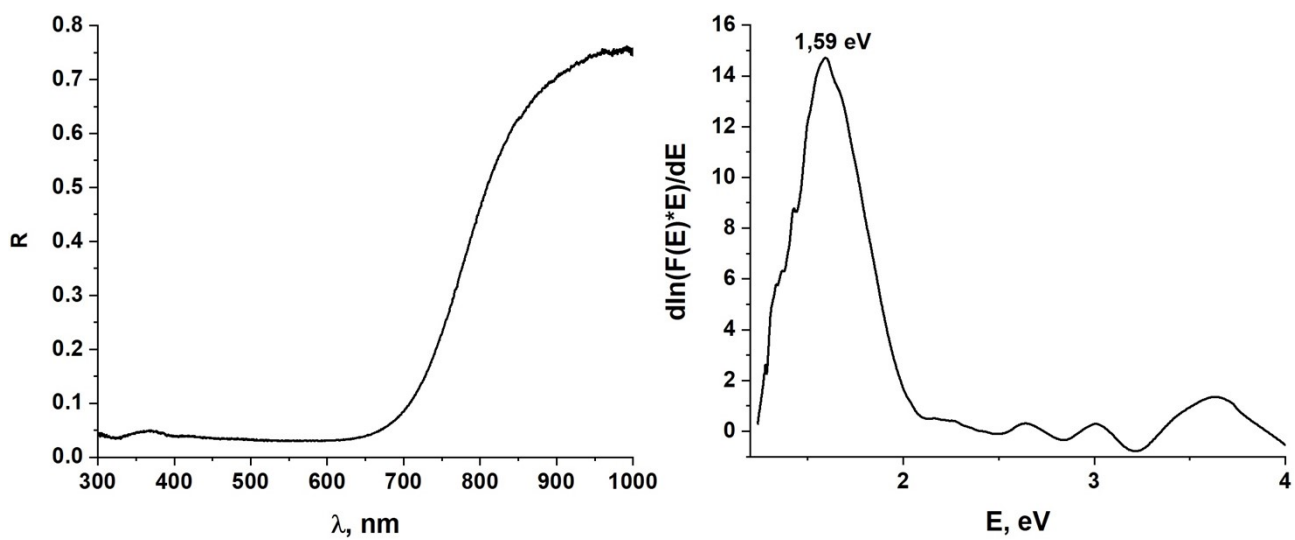

Figure S14. Diffuse reflectance spectra and optical band gap determination for **2**.

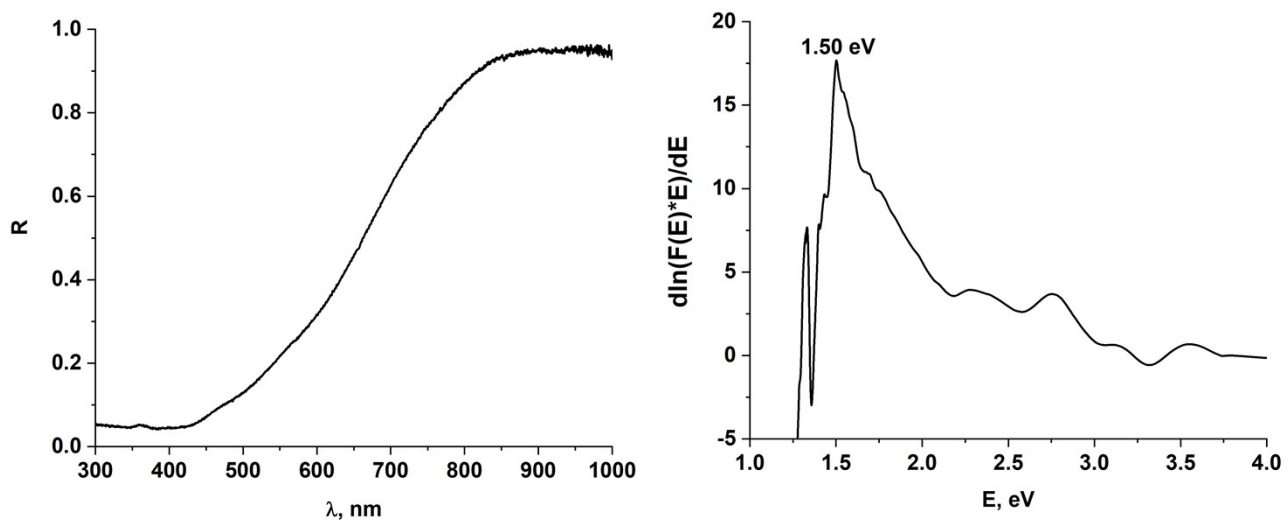

Figure S15. Diffuse reflectance spectra and optical band gap determination for **3**.

**Table S7.** Values of the density of all electrons –  $\rho(\mathbf{r})$ , Laplacian of electron density –  $\nabla^2\rho(\mathbf{r})$  and appropriate  $\lambda_2$  eigenvalues, energy density –  $H_b$ , potential energy density –  $V(\mathbf{r})$ , and Lagrangian kinetic energy –  $G(\mathbf{r})$  (a.u.) at the bond critical points (3, -1), corresponding to various intermolecular interactions I $\cdots$ Cl in the X-ray structures **1–5**, and estimated strength for these interactions  $E_{\text{int}}$  (kcal/mol).

| Contact*                           | % <sub>v</sub> <sub>vdw</sub><br>sum | $\rho(\mathbf{r})$ | $\nabla^2\rho(\mathbf{r})$ | $\lambda_2$ | $H_b$ | $V(\mathbf{r})$ | $G(\mathbf{r})$ | $E_{\text{int}}^{**}$ |
|------------------------------------|--------------------------------------|--------------------|----------------------------|-------------|-------|-----------------|-----------------|-----------------------|
| <b>1</b>                           |                                      |                    |                            |             |       |                 |                 |                       |
| I10 $\cdots$ Cl6 3.823 Å (type I)  | 102                                  | 0.006              | 0.022                      | -0.006      | 0.001 | -0.003          | 0.004           | 1.3                   |
| I1 $\cdots$ Cl7 3.976 Å (type I)   | 107                                  | 0.005              | 0.017                      | -0.005      | 0.001 | -0.002          | 0.003           | 0.9                   |
| I2 $\cdots$ Cl7 3.976 Å (type I)   | 107                                  | 0.005              | 0.017                      | -0.005      | 0.001 | -0.002          | 0.003           | 0.9                   |
| I12 $\cdots$ Cl4 3.127 Å (type II) | 84                                   | 0.021              | 0.049                      | -0.021      | 0.000 | -0.012          | 0.012           | 5.1                   |
| <b>2</b>                           |                                      |                    |                            |             |       |                 |                 |                       |
| I2 $\cdots$ Cl8 3.882 Å (type I)   | 104                                  | 0.006              | 0.020                      | -0.006      | 0.001 | -0.003          | 0.004           | 1.3                   |
| I1 $\cdots$ Cl8 3.961 Å (type I)   | 106                                  | 0.005              | 0.017                      | -0.005      | 0.001 | -0.002          | 0.003           | 0.9                   |
| I11 $\cdots$ Cl6 3.926 Å (type I)  | 105                                  | 0.005              | 0.019                      | -0.005      | 0.001 | -0.003          | 0.004           | 1.3                   |
| I10 $\cdots$ Cl6 4.024 Å (type I)  | 108                                  | 0.004              | 0.016                      | -0.004      | 0.001 | -0.002          | 0.003           | 0.9                   |
| I12 $\cdots$ Cl4 3.117 Å (type II) | 84                                   | 0.019              | 0.044                      | -0.019      | 0.000 | -0.011          | 0.011           | 4.7                   |
| <b>3</b>                           |                                      |                    |                            |             |       |                 |                 |                       |
| I1 $\cdots$ Cl11 3.188 Å (type II) | 85                                   | 0.019              | 0.045                      | -0.019      | 0.000 | -0.011          | 0.011           | 4.7                   |
| I3 $\cdots$ Cl6 3.190 Å (type II)  | 86                                   | 0.018              | 0.044                      | -0.018      | 0.000 | -0.011          | 0.011           | 4.7                   |
| <b>4</b>                           |                                      |                    |                            |             |       |                 |                 |                       |
| I10 $\cdots$ Cl5 3.937 Å (type I)  | 106                                  | 0.005              | 0.018                      | -0.005      | 0.001 | -0.003          | 0.004           | 1.3                   |

|                             |     |       |       |        |       |        |       |     |
|-----------------------------|-----|-------|-------|--------|-------|--------|-------|-----|
| I8...C17 3.213 Å (type II)  | 86  | 0.018 | 0.041 | -0.018 | 0.000 | -0.010 | 0.010 | 4.3 |
| <b>5</b>                    |     |       |       |        |       |        |       |     |
| I10...C15 3.741 Å (type I)  | 100 | 0.008 | 0.027 | -0.008 | 0.001 | -0.004 | 0.005 | 1.7 |
| I17...C14 3.913 Å (type I)  | 105 | 0.005 | 0.019 | -0.005 | 0.001 | -0.003 | 0.004 | 1.3 |
| I16...C14 4.193 Å (type I)  | 112 | 0.003 | 0.011 | -0.003 | 0.001 | -0.001 | 0.002 | 0.4 |
| I1...C18 3.723 Å (type I)   | 100 | 0.008 | 0.027 | -0.008 | 0.001 | -0.004 | 0.005 | 1.7 |
| I19...C17 3.825 Å (type I)  | 103 | 0.006 | 0.022 | -0.006 | 0.001 | -0.003 | 0.004 | 1.3 |
| I12...C16 3.004 Å (type II) | 81  | 0.026 | 0.056 | -0.026 | 0.000 | -0.017 | 0.017 | 7.3 |
| I15...C19 3.126 Å (type II) | 84  | 0.021 | 0.048 | -0.021 | 0.000 | -0.012 | 0.012 | 5.1 |

\* Two types of short contacts involving halogen atoms usually discussed in the literature. Type I is believed to depend on the effects of crystal packing, while type II is due to a classic halogen bonding, see [Chem. Rev. 2016, 116, 2478.] for details. The Bondi's (shortest) van der Waals radii for iodine and chlorine atoms are 1.98 and 1.75 Å, respectively [J. Phys. Chem. 1966, 70, 3006.]. The numeration of atoms corresponds to their ordering in attached xyz-files for model supramolecular associates.

\*\*  $E_{\text{int}} = 0.68(-V(\mathbf{r}))$  (this empirical correlation between the interaction energy and the potential energy density of electrons at the bond critical points (3, -1) was specifically developed for noncovalent interactions involving iodine atoms) [Russ. Chem. Rev. 2014, 83, 1181.]

**Table S8.** Cartesian atomic coordinates for model supramolecular associates.

| Atom     | X        | Y        | Z         |
|----------|----------|----------|-----------|
| <b>1</b> |          |          |           |
| I        | 2.497451 | 0.676169 | 12.190758 |
| I        | 0.676169 | 2.497451 | 12.972842 |
| Te       | 6.043284 | 6.043284 | 12.581800 |
| Cl       | 4.398021 | 7.701463 | 11.562423 |
| Cl       | 7.803944 | 7.803944 | 12.581800 |
| Cl       | 5.342697 | 6.690509 | 14.926041 |
| Cl       | 4.232561 | 4.232561 | 12.581800 |
| Cl       | 7.701463 | 4.398021 | 13.601177 |
| Cl       | 6.690509 | 5.342697 | 10.237559 |

|          |           |           |           |
|----------|-----------|-----------|-----------|
| I        | 4.037781  | 7.211401  | 18.481658 |
| I        | 2.216499  | 5.390119  | 19.263742 |
| I        | 2.497451  | 10.104069 | 12.190758 |
| I        | 0.676169  | 11.925351 | 12.972842 |
| <b>2</b> |           |           |           |
| I        | 9.977728  | 1.383569  | 5.700292  |
| I        | 11.163206 | 3.457131  | 6.947911  |
| Te       | 7.403558  | 6.595551  | 3.162051  |
| Cl       | 8.559774  | 8.434532  | 4.620894  |
| Cl       | 6.354019  | 4.851834  | 1.780108  |
| Cl       | 5.387966  | 6.548015  | 4.696278  |
| Cl       | 6.247343  | 8.434532  | 1.703207  |
| Cl       | 8.453098  | 4.851834  | 4.543993  |
| Cl       | 9.419151  | 6.548015  | 1.627824  |
| I        | 1.504428  | 6.224269  | 5.700292  |
| I        | 2.689906  | 8.297831  | 6.947911  |
| I        | 9.977728  | 11.064969 | 5.700292  |
| I        | 11.163206 | 13.138531 | 6.947911  |
| <b>3</b> |           |           |           |
| I        | -0.008375 | 2.998127  | 5.439799  |
| I        | -1.574635 | 2.998127  | 3.241655  |
| I        | 7.101740  | 5.220449  | 5.206963  |
| I        | 9.175050  | 5.220449  | 3.474492  |
| Te       | 2.823996  | 5.771843  | 9.070730  |
| Cl       | 4.724081  | 5.791482  | 7.254918  |
| Cl       | 3.775162  | 7.672964  | 10.237518 |
| Cl       | 0.909794  | 5.669716  | 10.600576 |
| Cl       | 1.488707  | 7.310704  | 7.597140  |
| Cl       | 4.155657  | 4.283155  | 10.636691 |
| Cl       | 1.891511  | 3.495122  | 7.951344  |
| <b>4</b> |           |           |           |
| Te       | 5.174377  | 5.679744  | 4.211218  |
| Cl       | 2.983211  | 5.720899  | 2.973793  |
| Cl       | 4.330596  | 7.375697  | 5.698788  |
| Cl       | 6.117185  | 3.689400  | 2.590067  |
| Cl       | 7.365542  | 5.720899  | 5.448642  |
| Cl       | 6.018157  | 7.375697  | 2.723647  |
| Cl       | 4.231569  | 3.689400  | 5.832368  |
| I        | 3.793250  | 1.069020  | 7.639486  |
| I        | 3.254957  | -1.069020 | 9.205385  |
| I        | 10.617900 | 6.075670  | 7.639486  |
| I        | 10.079607 | 3.937630  | 9.205385  |
| <b>5</b> |           |           |           |
| I        | 0.542485  | 6.294432  | 11.192459 |
| I        | 0.958458  | 8.489948  | 9.687750  |
| Te       | 1.869525  | 3.015299  | 6.300181  |
| Cl       | 4.367128  | 2.960434  | 6.593963  |
| Cl       | -0.630126 | 3.074162  | 6.025222  |
| Cl       | 1.907435  | 1.261205  | 4.278160  |
| Cl       | 2.060980  | 4.767595  | 4.605219  |
| Cl       | 1.701235  | 4.649169  | 8.060520  |

|    |           |           |           |
|----|-----------|-----------|-----------|
| Cl | 1.680206  | 1.107202  | 8.128588  |
| I  | -4.295544 | 3.699268  | 5.614297  |
| I  | -4.711517 | 1.503752  | 7.119006  |
| I  | 2.419015  | -1.297582 | 2.789081  |
| I  | 2.834988  | -3.493098 | 1.284372  |
| I  | 0.542485  | -3.699268 | 11.192459 |
| I  | 0.958458  | -1.503752 | 9.687750  |
| I  | 8.376656  | 3.699268  | 5.614297  |
| I  | 7.960683  | 1.503752  | 7.119006  |
| I  | 2.419015  | 8.696118  | 2.789081  |
| I  | 2.834988  | 6.500602  | 1.284372  |
